# Supplementary material for: Reduction of pulmonary toxicity of metal oxide nanoparticles by phosphonate-based surface passivation
Source: PubMed Central journal article supplement (PMC5399805; doi:10.1186/s12989-017-0193-5), 2017-04-21
Supplement: 12989_2017_193_MOESM1_ESM.pdf [file 12989_2017_193_MOESM1_ESM.pdf]

**Table S1** Zeta potential and hydrodynamic size of uncoated and EDTMP coated MO<sub>x</sub>

| Nanoparticles                  |            | Zeta Potential (mV) |             |             | Hydrodynamic size (nm) |            |            |
|--------------------------------|------------|---------------------|-------------|-------------|------------------------|------------|------------|
|                                |            | H <sub>2</sub> O    | RPMI        | BEGM        | H <sub>2</sub> O       | RPMI       | BEGM       |
| Ni <sub>2</sub> O <sub>3</sub> | No Coating | -24.70±1.86         | -5.33±1.17  | -7.31±1.28  | 523.7±1.6              | 641.9±24.4 | 389.7±3.1  |
|                                | EDTMP      | -55.08±2.82         | -3.94±0.17  | -1.84±5.89  | 274.2±3.4              | 545.2±5.7  | 499.6±6.0  |
| TiO <sub>2</sub>               | No Coating | -7.85±0.51          | 11.21±4.29  | 7.95±4.27   | 435.1±3.3              | 608.8±8.7  | 515.2±10.2 |
|                                | EDTMP      | -35.29±1.06         | -2.60±4.74  | -3.97±7.22  | 469.1±13.2             | 545.2±5.7  | 551.8±13.0 |
| CuO                            | No Coating | 23.26±0.40          | -0.59±13.12 | -2.19±4.41  | 270.1±5.5              | 323.2±7.5  | 457.5±5.5  |
|                                | EDTMP      | -29.01±1.57         | -10.39±2.56 | -7.65±2.50  | 198.2±7.5              | 203.1±5.6  | 561.9±22.8 |
| CoO                            | No Coating | 29.40±0.39          | -10.27±3.85 | -0.66±6.36  | 369.1±22.7             | 351.8±8.4  | 403.7±4.3  |
|                                | EDTMP      | -22.81±1.61         | -9.15±4.77  | -6.18±2.26  | 252.7±11.7             | 232.5±1.9  | 326.1±7.1  |
| Co <sub>3</sub> O <sub>4</sub> | No Coating | 21.00±2.36          | 4.56±6.36   | -2.81±6.34  | 221.3±2.9              | 444.9±2.5  | 663.5±21.9 |
|                                | EDTMP      | -23.09±0.90         | 2.01±3.79   | -1.60±11.50 | 184.8±2.2              | 338.1±16.3 | 447.3±3.9  |
