# Supplementary material for: Reduction of pulmonary toxicity of metal oxide nanoparticles by phosphonate-based surface passivation
Source: PubMed Central journal article supplement (PMC5399805; doi:10.1186/s12989-017-0193-5), 2017-04-21
Supplement: 12989_2017_193_MOESM2_ESM.pdf [file 12989_2017_193_MOESM2_ESM.pdf]

### Distribution of MOx in lysosomes by confocal

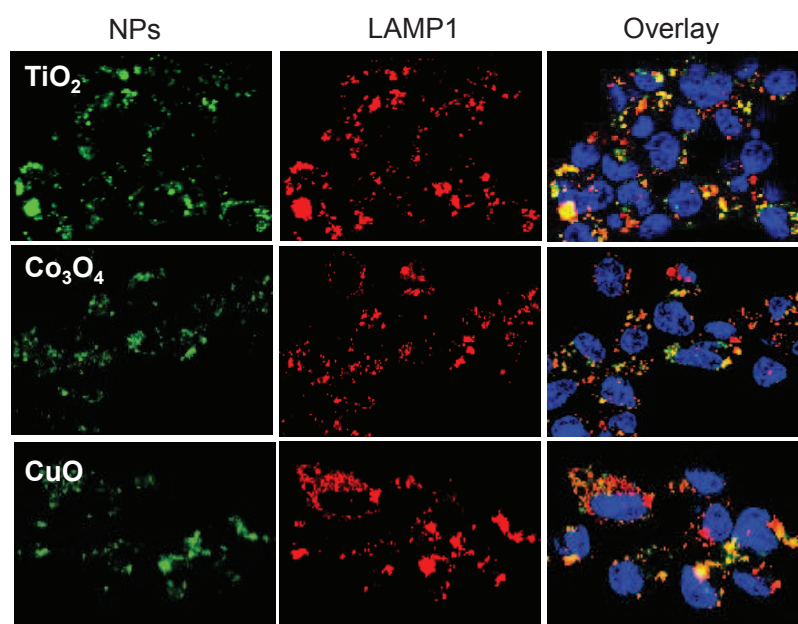

**Figure S1. Intracellular distribution of MOx by confocal imaging.**

THP-1 cells were exposed to 25 µg/mL TiO<sub>2</sub>, Co<sub>3</sub>O<sub>4</sub> or CuO nanoparticle suspensions for 16 h. Then the cells were stained with Hoechst 33342 and Alexa Fluor 594 labeled anti-LAMP1 to visualize the nuclei and lysosomes, respectively, by SP2 1P/FCS and Leica confocal SP2 MP-FLIM microscope.
