# Supplementary material for: Reduction of pulmonary toxicity of metal oxide nanoparticles by phosphonate-based surface passivation
Source: PubMed Central journal article supplement (PMC5399805; doi:10.1186/s12989-017-0193-5), 2017-04-21
Supplement: 12989_2017_193_MOESM3_ESM.pdf [file 12989_2017_193_MOESM3_ESM.pdf]

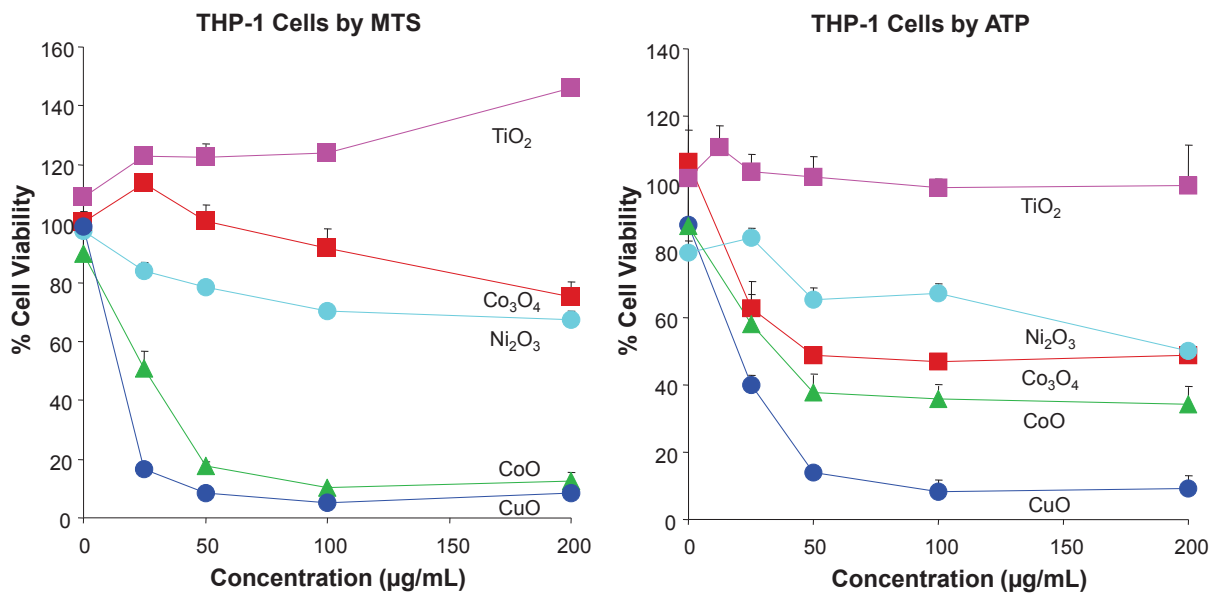

**Figure S2. Assessment of cell viability in THP-1 cells exposed to MOx.**

THP-1 cells were exposed to MOx suspensions for 24 h. The cell viability was tested by MTS (left panel) or ATP (right panel) assay by measuring the absorbance or luminescence on a SpectraMax M5 microplate spectrophotometer.
