# Supplementary material for: Reduction of pulmonary toxicity of metal oxide nanoparticles by phosphonate-based surface passivation
Source: PubMed Central journal article supplement (PMC5399805; doi:10.1186/s12989-017-0193-5), 2017-04-21
Supplement: 12989_2017_193_MOESM4_ESM.pdf [file 12989_2017_193_MOESM4_ESM.pdf]

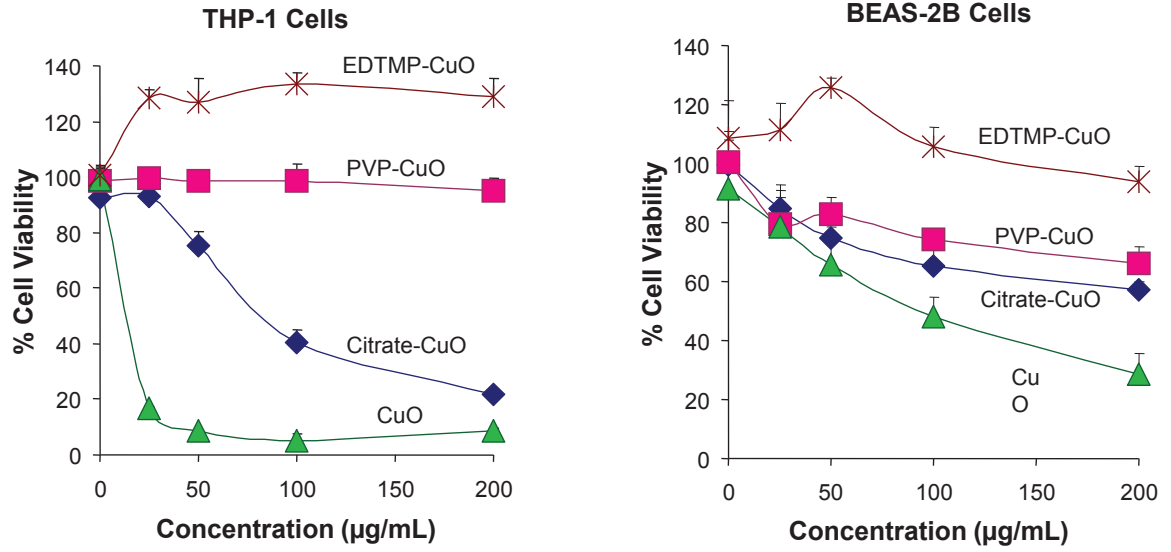

**Figure S3. Cell viabilities of PVP, citrate, EDTMP coated and uncoated CuO NPs.**

THP-1 or BEAS-2B cells were exposed to EDTMP, citrate, PVP coated and uncoated CuO NPs for 24 h. The cell viability was tested by MTS assay.
