# Supplementary material for: Reduction of pulmonary toxicity of metal oxide nanoparticles by phosphonate-based surface passivation
Source: PubMed Central journal article supplement (PMC5399805; doi:10.1186/s12989-017-0193-5), 2017-04-21
Supplement: 12989_2017_193_MOESM5_ESM.pdf [file 12989_2017_193_MOESM5_ESM.pdf]

A

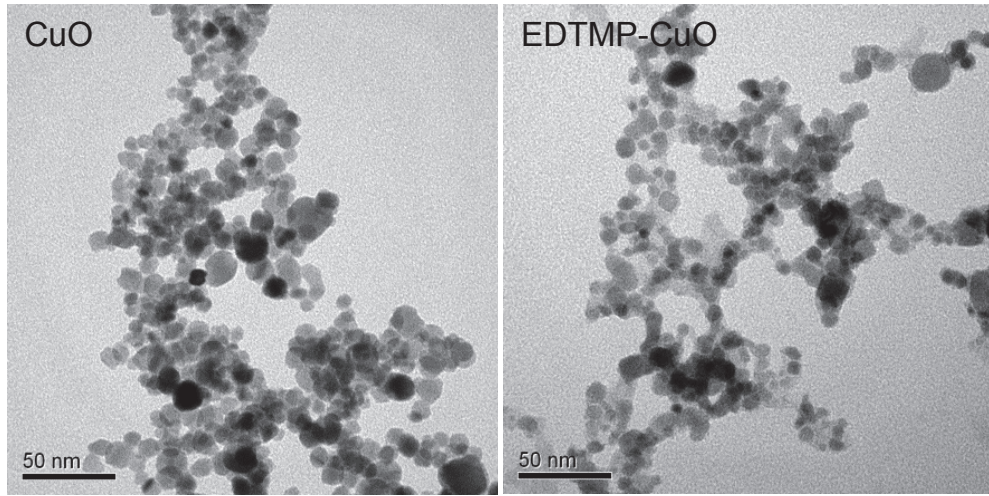

B

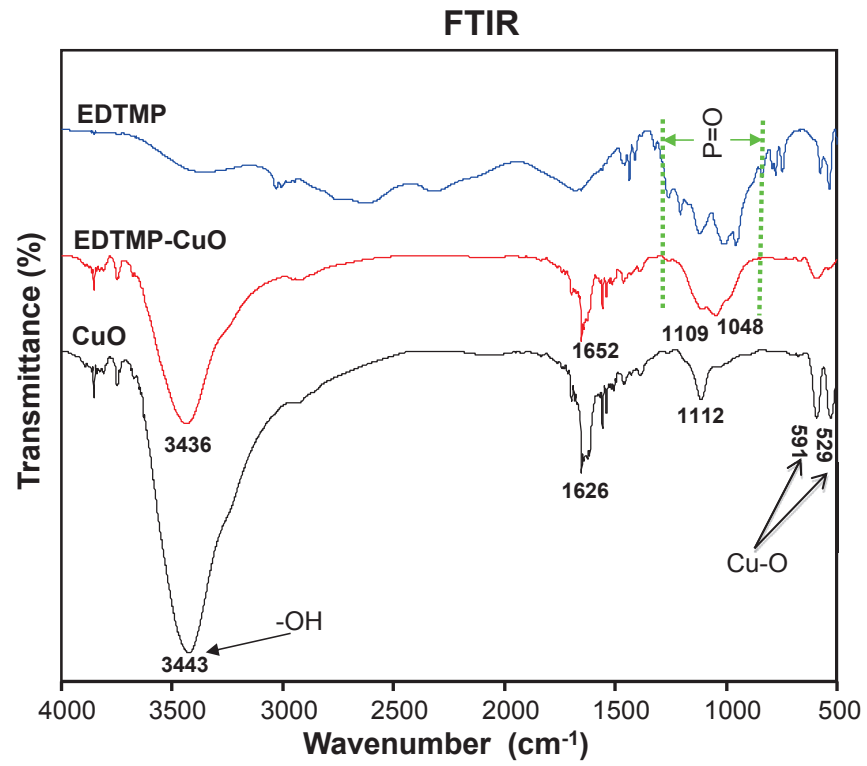

C

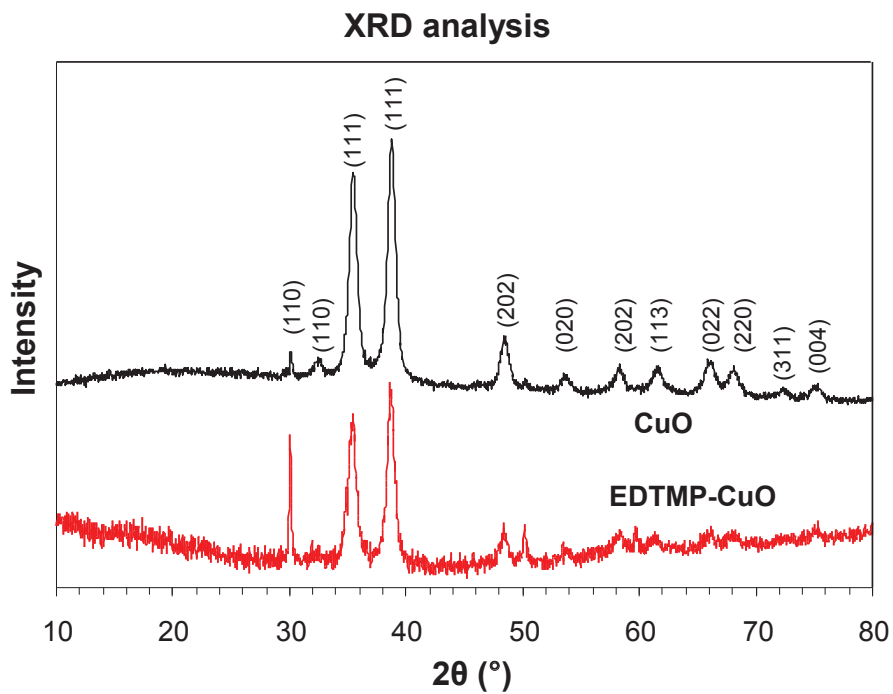

**Figure S4. Characterization of CuO particles following EDTMP coating.**

A) TEM images of uncoated and coated CuO particles, B) FTIR spectra of uncoated and EDTMP-coated CuO as well as EDTMP by itself and C) XRD spectra of uncoated and coated particles. Both the coated and uncoated CuO particles show similar sphere shape with size at 10-20 nm. The presence of an EDTMP coating is demonstrated by characteristic P=O peaks. XRD analysis indicates that EDTMP coating do not change the crystal structure of CuO NPs.
