# Supplementary material for: Reduction of pulmonary toxicity of metal oxide nanoparticles by phosphonate-based surface passivation
Source: PubMed Central journal article supplement (PMC5399805; doi:10.1186/s12989-017-0193-5), 2017-04-21
Supplement: 12989_2017_193_MOESM6_ESM.pdf [file 12989_2017_193_MOESM6_ESM.pdf]

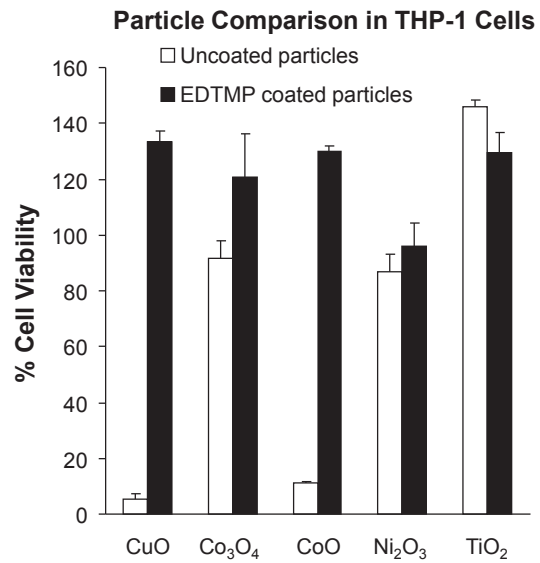

**Figure S5. Viabilities of THP-1 cells exposed to uncoated and EDTMP coated MO<sub>x</sub>.**

After 24 h exposure of THP-1 cells 200 µg/mL MO suspensions, the cell viabilities were determined by MTS assay.
