# Supplementary material for: Reduction of pulmonary toxicity of metal oxide nanoparticles by phosphonate-based surface passivation
Source: PubMed Central journal article supplement (PMC5399805; doi:10.1186/s12989-017-0193-5), 2017-04-21
Supplement: 12989_2017_193_MOESM7_ESM.pdf [file 12989_2017_193_MOESM7_ESM.pdf]

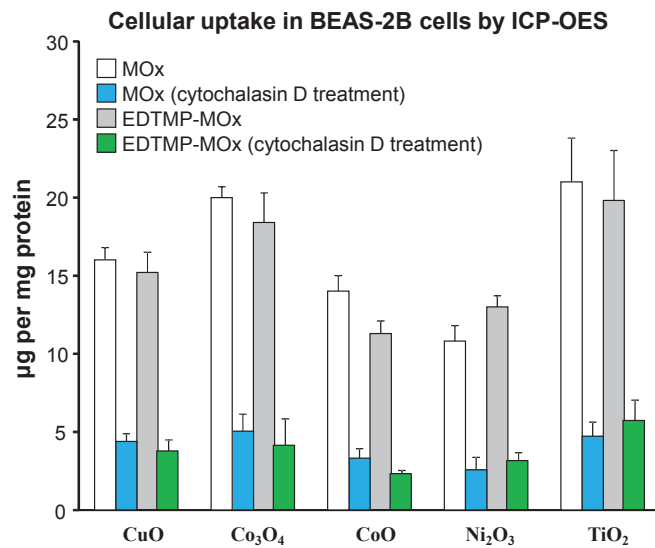

**Figure S6. Influence of EDTMP coating to the cellular uptake mechanism of MOx.** BEAS-2B cells pretreated with 5 µg/mL cytochalasin D for 3 h were incubated with 50 µg/mL nanoparticles for an additional 6 h. The cellular uptake levels of MOx were determined by ICP-OES.
