# Supplementary material for: Reduction of pulmonary toxicity of metal oxide nanoparticles by phosphonate-based surface passivation
Source: PubMed Central journal article supplement (PMC5399805; doi:10.1186/s12989-017-0193-5), 2017-04-21
Supplement: 12989_2017_193_MOESM8_ESM.pdf [file 12989_2017_193_MOESM8_ESM.pdf]

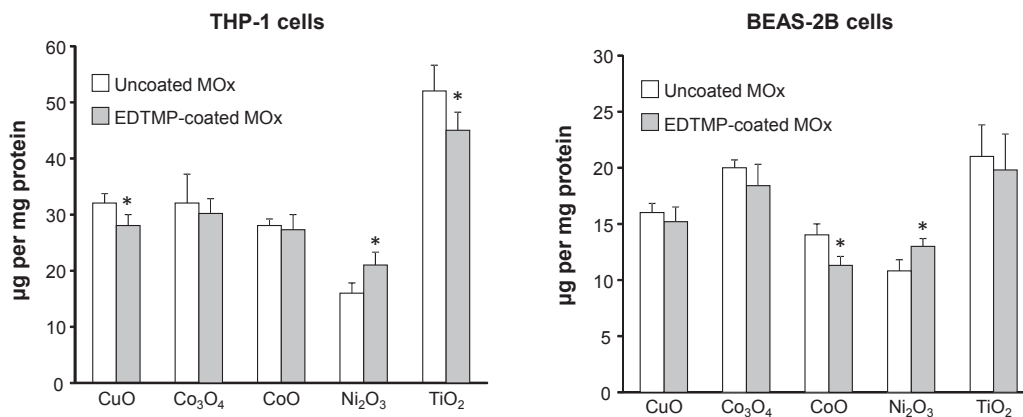

**Figure S7. Cellular uptake levels of coated and uncoated MOx.** THP-1 or BEAS-2B cells were treated with 50 µg/mL nanoparticles for 6h. After thorough washing, the cells were lysed to determine the protein concentrations as well as the metal elements. \*  $p < 0.05$  compared to uncoated particles.
